# Supplementary material for: Notch intracellular domain overexpression in adipocytes confers lipodystrophy in mice
Source: PubMed Central journal article supplement — Mol Metab. 2015 May 2;4(7):543–50. doi: 10.1016/j.molmet.2015.04.004 (PMC4481462; doi:10.1016/j.molmet.2015.04.004), 2015-05-02
Supplement: mmc1.pdf [file mmc1.pdf]

# Supplemental data

Fig. S1

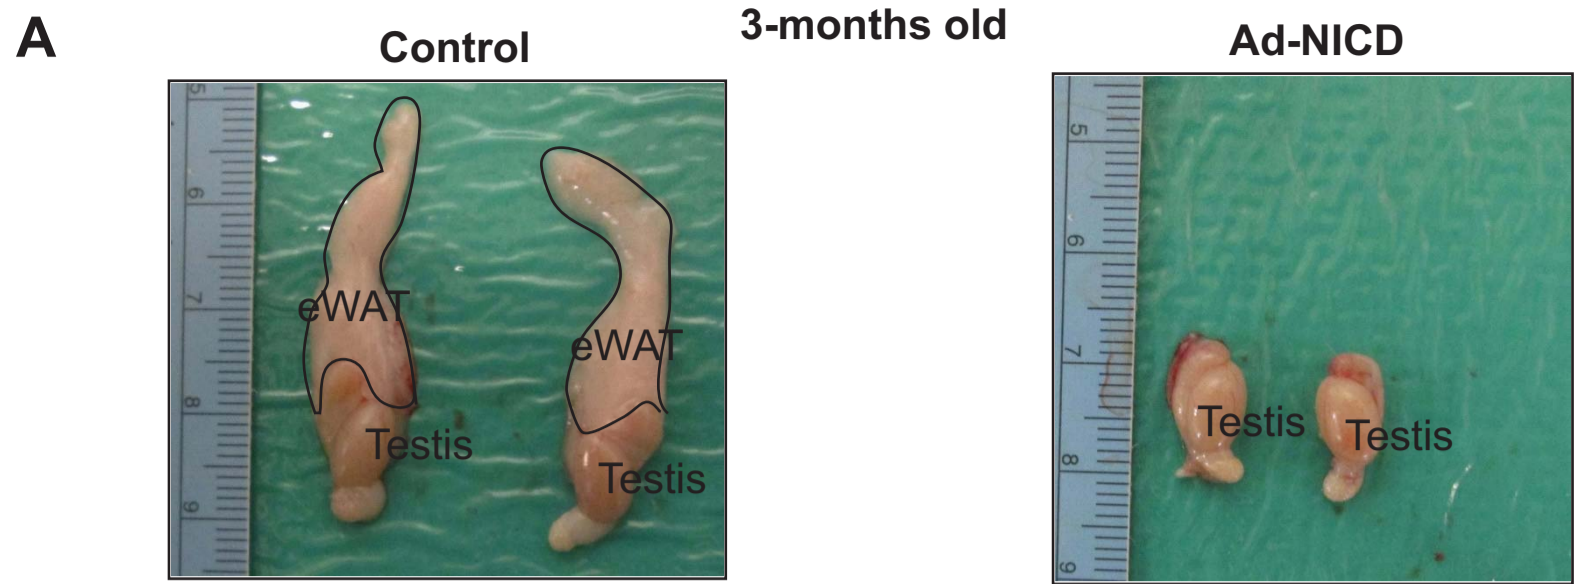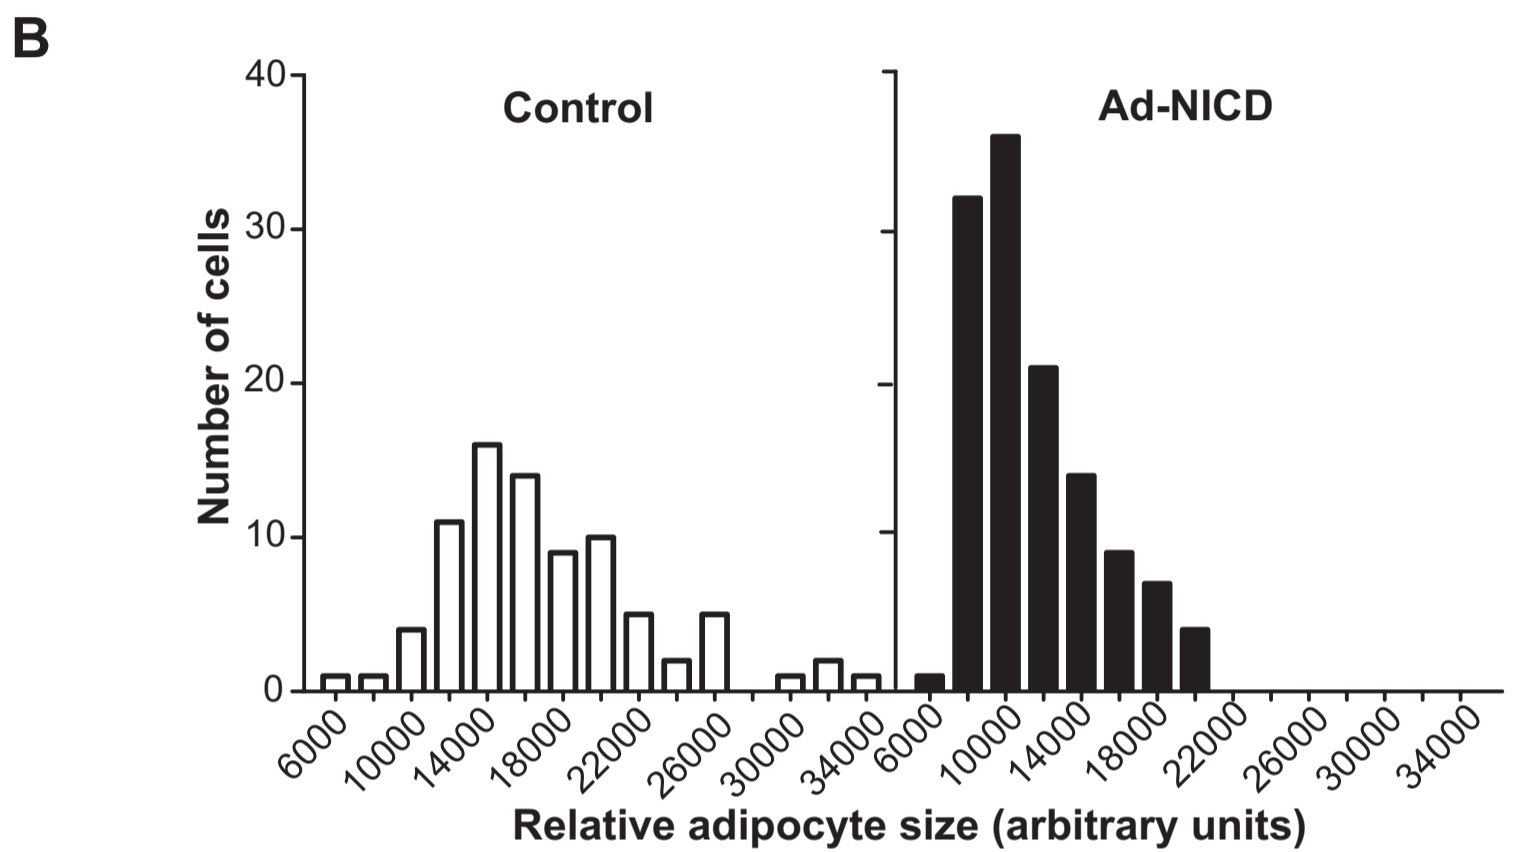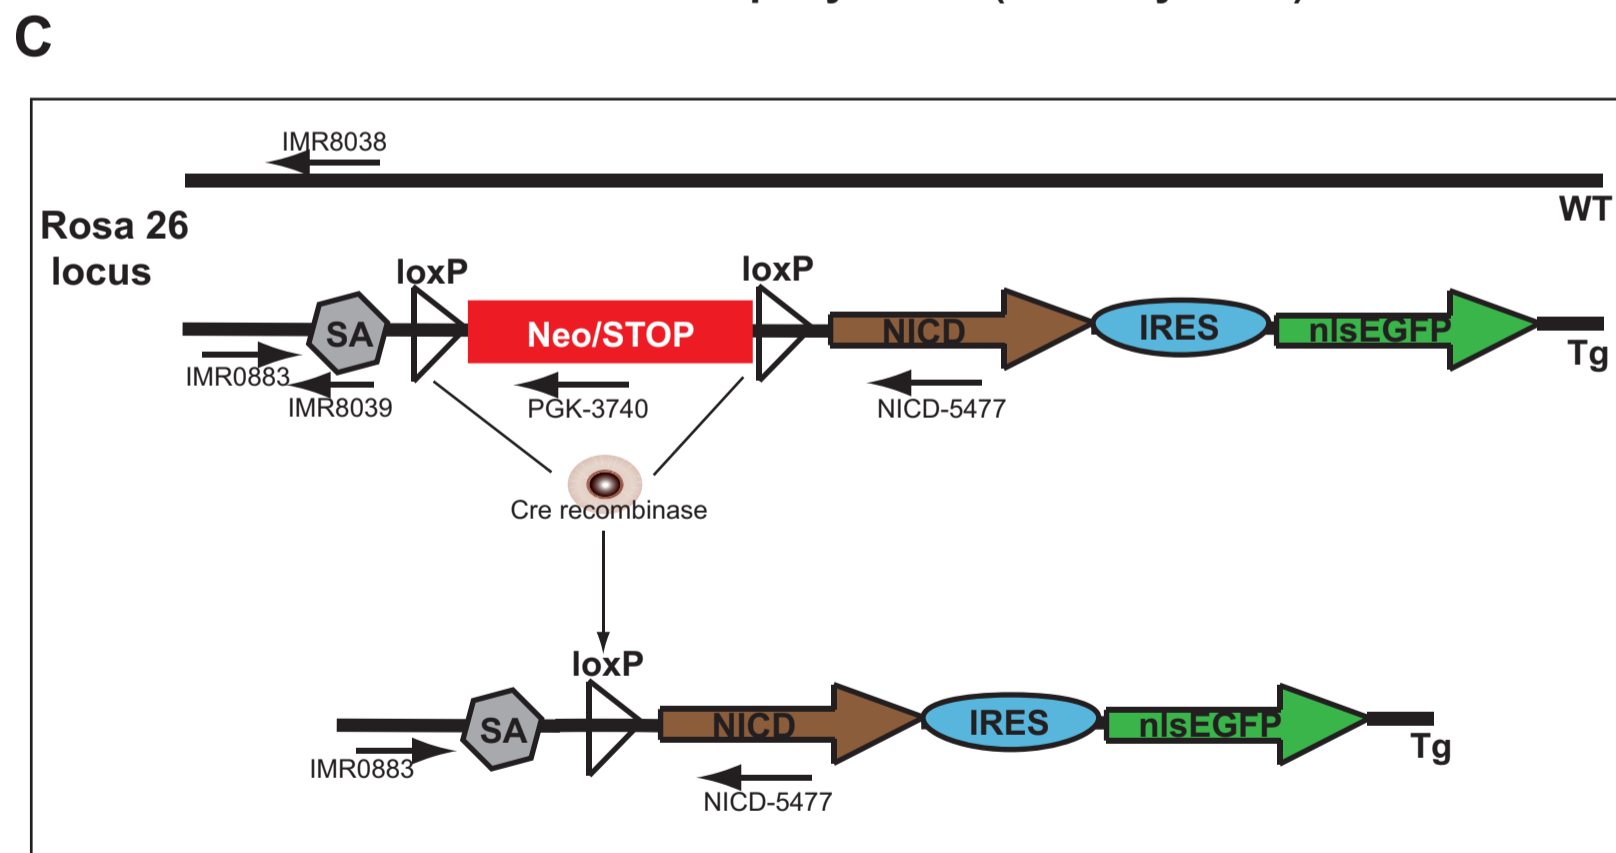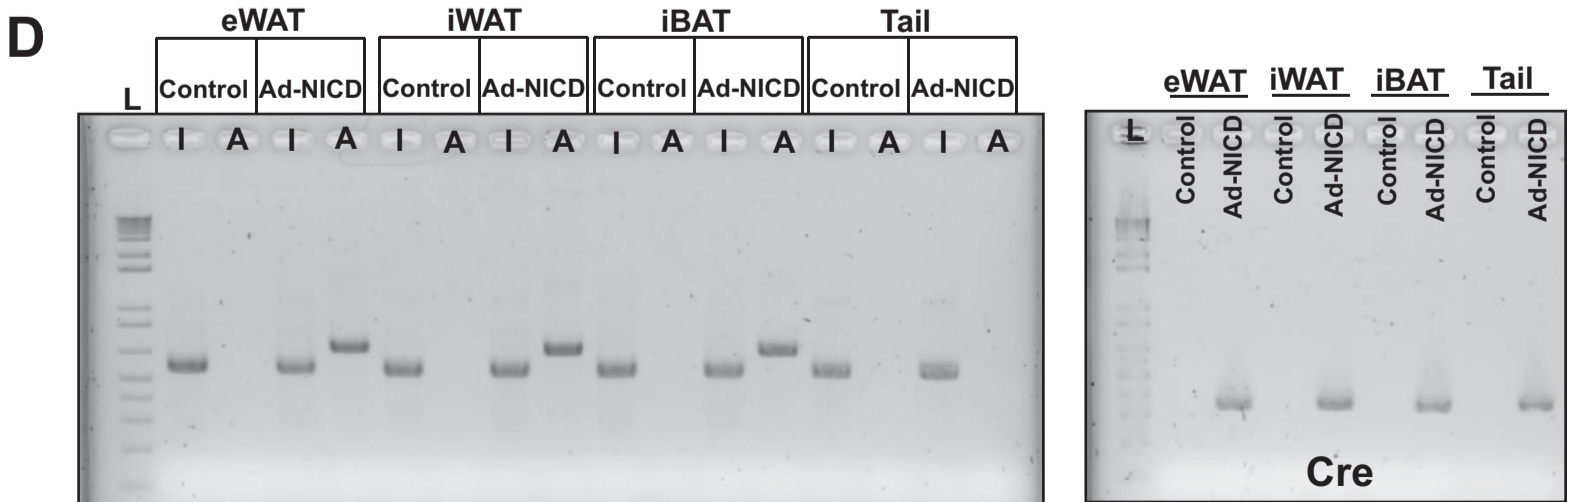

**Figure S1.**

- A.** Necropsy photos of the epididymal white adipose tissue (eWAT) in 3-month old male mice. Ruler values are in cm.
- B.** A representative histogram of the distribution of the adipocytes size in epididymal white adipose tissue of 1-month old male mice. Total number of samples processed n=3 per genotype.
- C.** A schematic representation of the Rosa<sup>NICD/NICD</sup> system. Arrows indicate the primers used for genotyping and for detection of the recombination. Primer sequences can be found in the supplemental experimental procedures.
- D.** Detection of the recombination in epididymal white adipose tissue (eWAT), inguinal white adipose tissue (iWAT) and interscapular brown adipose tissue (iBAT). Genomic DNA from these tissues was used as a template for the PCR. Tail DNA was used as a negative control for recombination. PCR products were run in a 2% agarose gel. Left panel: “I” in each lane indicates that the primer pair IMR0883 and the PGK-3740 was used for the detection of the “inactive” allele (absence of recombination). “A” in each lane indicates that the primer pair IMR0883 and NICD-5477 was used for the detection of the “active” allele (presence of recombination). Right panel; detection of the Cre transgene. The DNA ladder used is the 1kb plus ladder (Life Technologies).

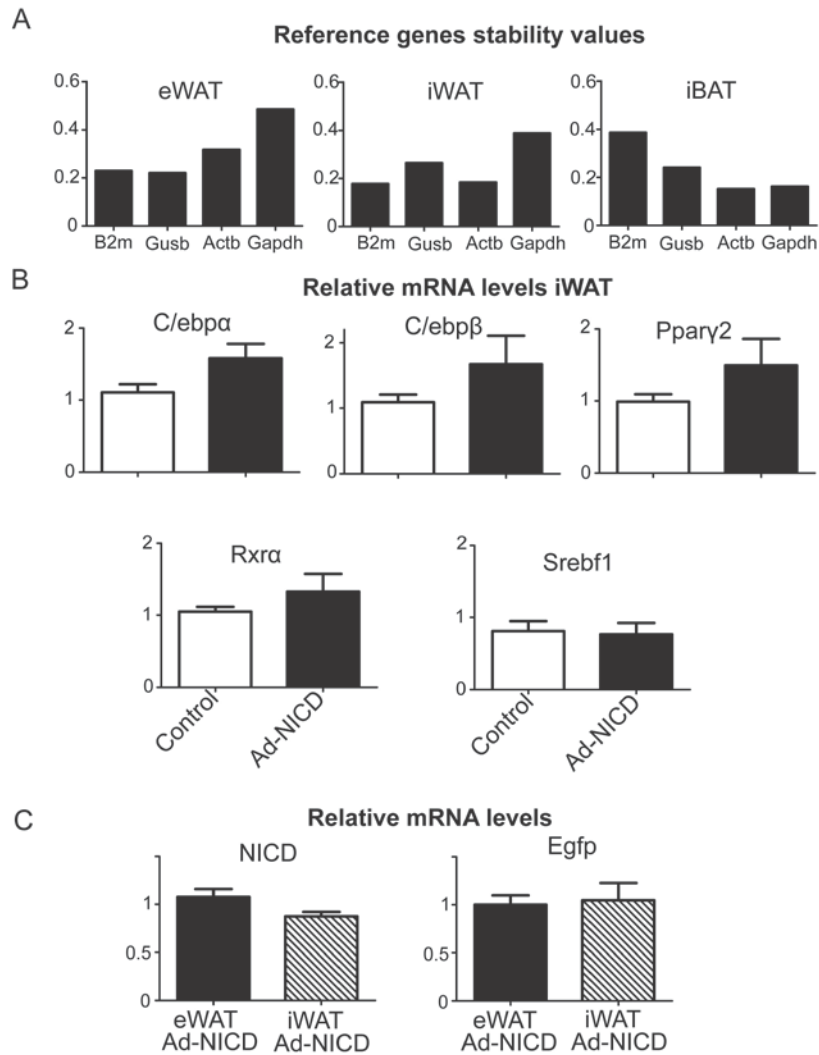

**Figure S2.**

- A.** Stability values of reference genes using the genorm algorithm. The geometric means of the two most “stable” genes (lower values) were selected to be used in the normalization of the results of the quantitative real-time PCR for each tissue. B2m; beta-2-microglobulin, Gusb; beta-glucuronidase, Actb; beta-actin, Gapdh; glyceraldehyde-3-phosphate dehydrogenase.
- B.** Relative mRNA levels of genes of interest in inguinal white adipose tissue (iWAT). n=8 for the control and n=9 for the Ad-NICD. Data are mean  $\pm$  SE, \*p<0.05.
- C.** Relative mRNA levels of NICD and Egfp in eWAT and iWAT of Ad-NICD mice. Egfp; enhanced green fluorescent protein. n=9 for each tissue. Data are mean  $\pm$  SE.

## **Supplemental Experimental Procedures**

### **Distribution of adipocyte size**

To assess the size of the adipocytes in the white adipose tissue, photos from H&E sections of our samples were used and were analyzed in a computer with the NIS- Element AR software (Nikon instruments) that was kindly provided by the Center of Biological Imaging (CBI) in the University of Pittsburgh. A representative histogram of the adipocyte size distribution can be seen in Figure S1B.

### **Mouse models**

The primer sequences used for genotyping the mouse models were based on our previous work [1] and are summarized below.

| <b>Primer</b> | <b>Sequence</b>                |
|---------------|--------------------------------|
| IMR0883       | AAAGTCGCTCTGAGTTGTTAT          |
| IMR8038       | TAAGCCTGCCCAGAAGACTC           |
| IMR8039       | GAAAGACCGCGAAGAGTTTG           |
| PGK-3740      | GATGTGGAATGTGTGCGAGGCCAGAGGC   |
| NICD-5477     | GATTGTCGTCCATCAGAGCACCATCTGAGG |
| Cre-1         | ACGTTCAACGGCATCAACGT           |
| Cre-2         | CTGCATTACCGGTCGATGCA           |

A visual rough presentation of the localization of these primers on the wild-type or Rosa<sup>NICD</sup> allele can be found in Figure S1C.

In all PCR reaction 0.5 $\mu$ M of each primer was used. To genotype the experimental mice tail genomic DNA was used as a template. To detect the Rosa<sup>NICD</sup> allele the primers IMR0883, IMR8038 and IMR8039 were used in a single PCR reaction with the following cycling conditions;

| Step # | Temperature (°C) | Time (sec) | Note                  |
|--------|------------------|------------|-----------------------|
| 1      | 94               | 180        | -                     |
| 2      | 94               | 30         | -                     |
| 3      | 54               | 60         | -                     |
| 4      | 72               | 60         | Go to step 2 35 times |
| 5      | 72               | 120        |                       |
| 6      | 10               | hold       |                       |

The PCR product from this reaction is expected to be 235bp in case of the wild-type allele and 320bp in case of the Rosa<sup>NICD</sup> allele.

To detect the presence or absence of the Cre transgene in our model mice the primers Cre1 and Cre2 were used in a single reaction using tail genomic DNA as template. The cycling conditions used were the following;

| Step # | Temperature (°C) | Time (sec) | Note                  |
|--------|------------------|------------|-----------------------|
| 1      | 94               | 60         | -                     |
| 2      | 94               | 30         | -                     |
| 3      | 60               | 30         | -                     |
| 4      | 72               | 30         | Go to step 2 35 times |
| 5      | 10               | hold       |                       |

The expected product of this PCR in case of a Cre positive mouse is expected to be 355bp.

To confirm that the expected recombination by Cre recombinase has occurred in the target tissues in our mouse models, genomic DNA from eWAT, iWAT, iBAT and tail was used as a template. For detection of the “inactive allele” (absence of recombination) the the primer pair IMR0883 and the PGK-3740 was used. For detection of of the “active” allele (presence of recombination) the primer pair IMR0883 and NICD-5477 was used. The cycling conditions for both these PCR reactions were the following;

| <b>Step #</b> | <b>Temperature (°C)</b> | <b>Time (sec)</b> | <b>Note</b>           |
|---------------|-------------------------|-------------------|-----------------------|
| 1             | 95                      | 60                | -                     |
| 2             | 95                      | 30                | -                     |
| 3             | 66                      | 30                | -                     |
| 4             | 72                      | 20                | Go to step 2 35 times |
| 5             | 10                      | hold              |                       |

The expected PCR products from these reactions are 550bp for the “inactive allele” and 650bp for the “active allele” and can be seen in Figure S1D.

## Quantitative real-time PCR

The table in the following page summarizes the primer sequences used in quantitative real-time PCR (qPCR). The source of the primers sequences was PrimerBank [2] with the following exceptions; *C/ebpβ* [3], *Ppary2* [4], *Pgc-1α* and *Prdm16* [5], *Dio2* [6], *P2rx5* and *Pat2*[7]. *NICD* and *Egfp* primers were custom designed. Primers were used at a final concentration of 0.5μM in each PCR reaction with the following cycling conditions; 95°C for 10 sec, 61°C for 30 sec. To confirm specificity of the amplified products a melt curve was run for each PCR reaction.

To select the most suitable reference genes for the qPCR, the geNorm algorithm was used as described in the main text. The following on-line source was used for calculation of the stability value for each reference gene; <http://www.leonxie.com/referencegene.php?type=reference>. In figure S2A the stability values diagrams for the reference genes( *B2M*, *Gusb*, *ActB*, *GapdhI*) are shown for each tissue. The two most “stable” genes (the ones with the lower values) were selected and their geometric means was used for normalization of the qPCR data. Specifically, in the case of eWAT *B2M* and *Gusb*, in the case of iWAT *B2M* and *ActB* and in the case of iBAT *ActB* and *Gapdh*.

| <b>Gene</b>    | <b>Primer 1 (forward)</b> | <b>Primer 2 (reverse)</b> |
|----------------|---------------------------|---------------------------|
| <i>Hes-1</i>   | ATAGCTCCCGGCATTCCAAG      | GCGCGGTATTTCCCAACA        |
| <i>Lep</i>     | GAGACCCCTGTGTCCGGTTC      | CTGCGTGTGTGAAATGTCATTG    |
| <i>Fasn</i>    | GGAGGTGGTGATAGCCGGTAT     | TGGGTAATCCATAGAGCCCAG     |
| <i>Acacb</i>   | CCTTTGGCAACAAGCAAGGTA     | AGTCGTACACATAGGTGGTCC     |
| <i>C/ebpα</i>  | CAAGAACAGCAACGAGTACCG     | GTCACTGGTCAACTCCAGCAC     |
| <i>C/ebpβ</i>  | GGACTACGCAACACACGTGTAAC   | ACAAAACCAAAAACATCAACAACC  |
| <i>Pppary2</i> | CTCTGTTTTATGCTGTTATGGGTGA | GGTCAACAGGAGAATCTCCCAG    |
| <i>Rxra</i>    | ATGGACACCAAACATTTCTCTGC   | CCAGTGGAGAGCCGATTCC       |
| <i>Srebf1</i>  | GATGTGCGAACTGGACACAG      | CATAGGGGGCGTCAAACAG       |
| <i>Hsl</i>     | GATTTACGCACGATGACACAGT    | ACCTGCAAAGACATTAGACAGC    |
| <i>Adipsin</i> | CATGCTCGGCCCTACATGG       | CACAGAGTCGTCATCCGTCAC     |
| <i>Pgc-1α</i>  | CCCTGCCATTGTAAAGACC       | TGCTGCTGTTCCCTGTTTTTC     |
| <i>Dio2</i>    | CGCCCCAGTGTCAAGTTGT       | CCCGTAAGCTACGTTGGCATT     |
| <i>Ucp-1</i>   | CACTCAGGATTGGCCTCTACG     | GGGGTTTGATCCCATGCAGA      |
| <i>Cidea</i>   | TGACATTCATGGGATTGCAGAC    | GGCCAGTTGTGATGACTAAGAC    |
| <i>B2m</i>     | TTCTGGTGCTTGTCTCACTGA     | CAGTATGTTCCGGCTTCCCATTCC  |
| <i>Gusb</i>    | GTGGTATGAACGGGAAGCAAT     | AACTGCATAATAATGGGCACTGT   |
| <i>Actb</i>    | GGCTGTATTCCCCTCCATCG      | CCAGTTGGTAACAATGCCATGT    |
| <i>Gapdh</i>   | AGGTCGGTGTGAACGGATTTG     | TGTAGACCATGTAGTTGAGGTCA   |
| <i>Emr1</i>    | TGACTCACCTTGTGGTCCTAA     | CTTCCCAGAATCCAGTCTTTCC    |
| <i>Cd68</i>    | TGTCTGATCTTGCTAGGACCG     | GAGAGTAACGGCCTTTTTGTGA    |
| <i>Csf1r</i>   | TGTCATCGAGCCTAGTGGC       | CGGGAGATTCAGGGTCCAAG      |



|               |                      |                        |
|---------------|----------------------|------------------------|
| <i>P2rx5</i>  | CTGCAGCTCACCATCCTGT  | CACTCTGCAGGGAAGTGTC    |
| <i>Pat2</i>   | GTGCCAAGAAGCTGCAGAG  | TGTTGCCTTTGACCAGATGA   |
| <i>Prdm16</i> | CAGCACGGTGAAGCCATTC  | GCGTGCATCCGCTTGTG      |
| <i>NICD</i>   | TGAGACAGGCAACAGTGAAG | CAGCATCTGAACGAGAGTATCG |
| <i>Egfp</i>   | ATCATGGCCGACAAGCAGAA | TCTCGTTGGGGTCTTTGCTC   |

## Supplemental References

1. Wakabayashi, N., S. Shin, S.L. Slocum, E.S. Agoston, J. Wakabayashi, M.K. Kwak, et al., *Regulation of notch1 signaling by nrf2: implications for tissue regeneration*. *Sci Signal*, 2010. **3**(130): p. ra52.
2. Wang, X., A. Spandidos, H. Wang, and B. Seed, *PrimerBank: a PCR primer database for quantitative gene expression analysis, 2012 update*. *Nucleic Acids Res*, 2012. **40**(Database issue): p. D1144-9.
3. Jochheim, A., A. Cieslak, T. Hillemann, T. Cantz, J. Scharf, M.P. Manns, et al., *Multi-stage analysis of differential gene expression in BALB/C mouse liver development by high-density microarrays*. *Differentiation*, 2003. **71**(1): p. 62-72.
4. Lindgren, E.M., R. Nielsen, N. Petrovic, A. Jacobsson, S. Mandrup, B. Cannon, et al., *Noradrenaline represses PPAR (peroxisome-proliferator-activated receptor) gamma2 gene expression in brown adipocytes: intracellular signalling and effects on PPARgamma2 and PPARgamma1 protein levels*. *Biochem J*, 2004. **382**(Pt 2): p. 597-606.
5. Seale, P., B. Bjork, W. Yang, S. Kajimura, S. Chin, S. Kuang, et al., *PRDM16 controls a brown fat/skeletal muscle switch*. *Nature*, 2008. **454**(7207): p. 961-7.
6. Jimenez-Preitner, M., X. Berney, M. Uldry, A. Vitali, S. Cinti, J.G. Ledford, et al., *Plac8 is an inducer of C/EBPbeta required for brown fat differentiation, thermoregulation, and control of body weight*. *Cell Metab*, 2011. **14**(5): p. 658-70.
7. Ussar, S., K.Y. Lee, S.N. Dankel, J. Boucher, M.F. Haering, A. Kleinridders, et al., *ASC-1, PAT2, and P2RX5 are cell surface markers for white, beige, and brown adipocytes*. *Sci Transl Med*, 2014. **6**(247): p. 247ra103.
